# Supplementary material
Source: publisher figshare collection journal article supplement (https://tandf.figshare.com/articles/dataset/_/21194159)
Supplement: Supplementary file 3 [file 1]

Archive with 2 entries (2 files):
- EIT Food paper Supplementary File.pdf
- Supplementary File 2.pdf
